# Supplementary material
Source: publisher site journal article supplement (https://www.dovepress.com/article/398625)
Supplement: Supplementary file 1 [file get_supplementary_file.php]

**Supplementary Figures**

**
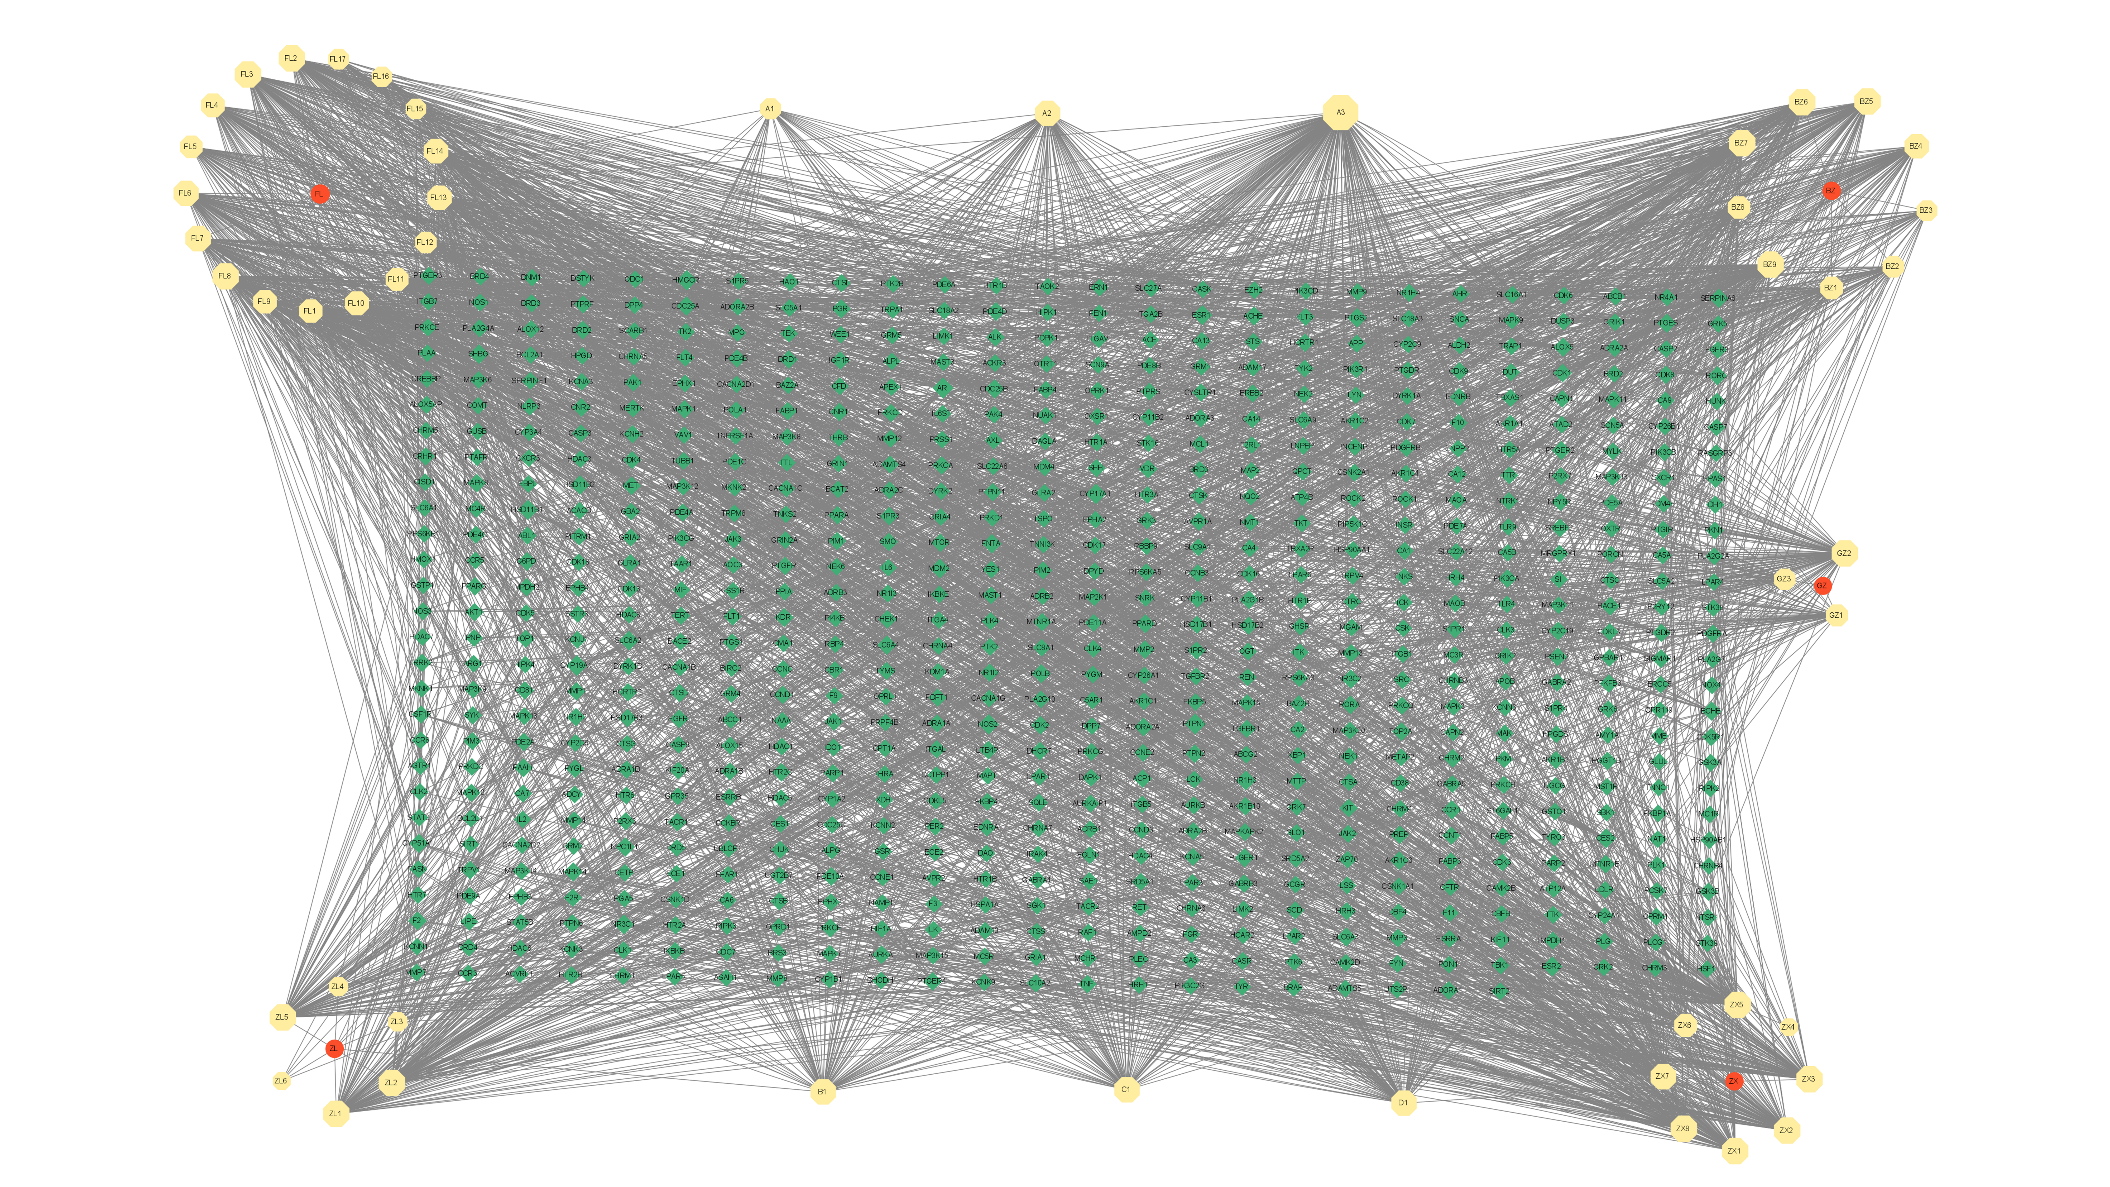
**

**Supplementary Figure 1** The WLS-active compound-target network: the red circles in the network represent the drugs in WLS, the orange hexagons represent the active components, and the green diamonds represent the target genes.


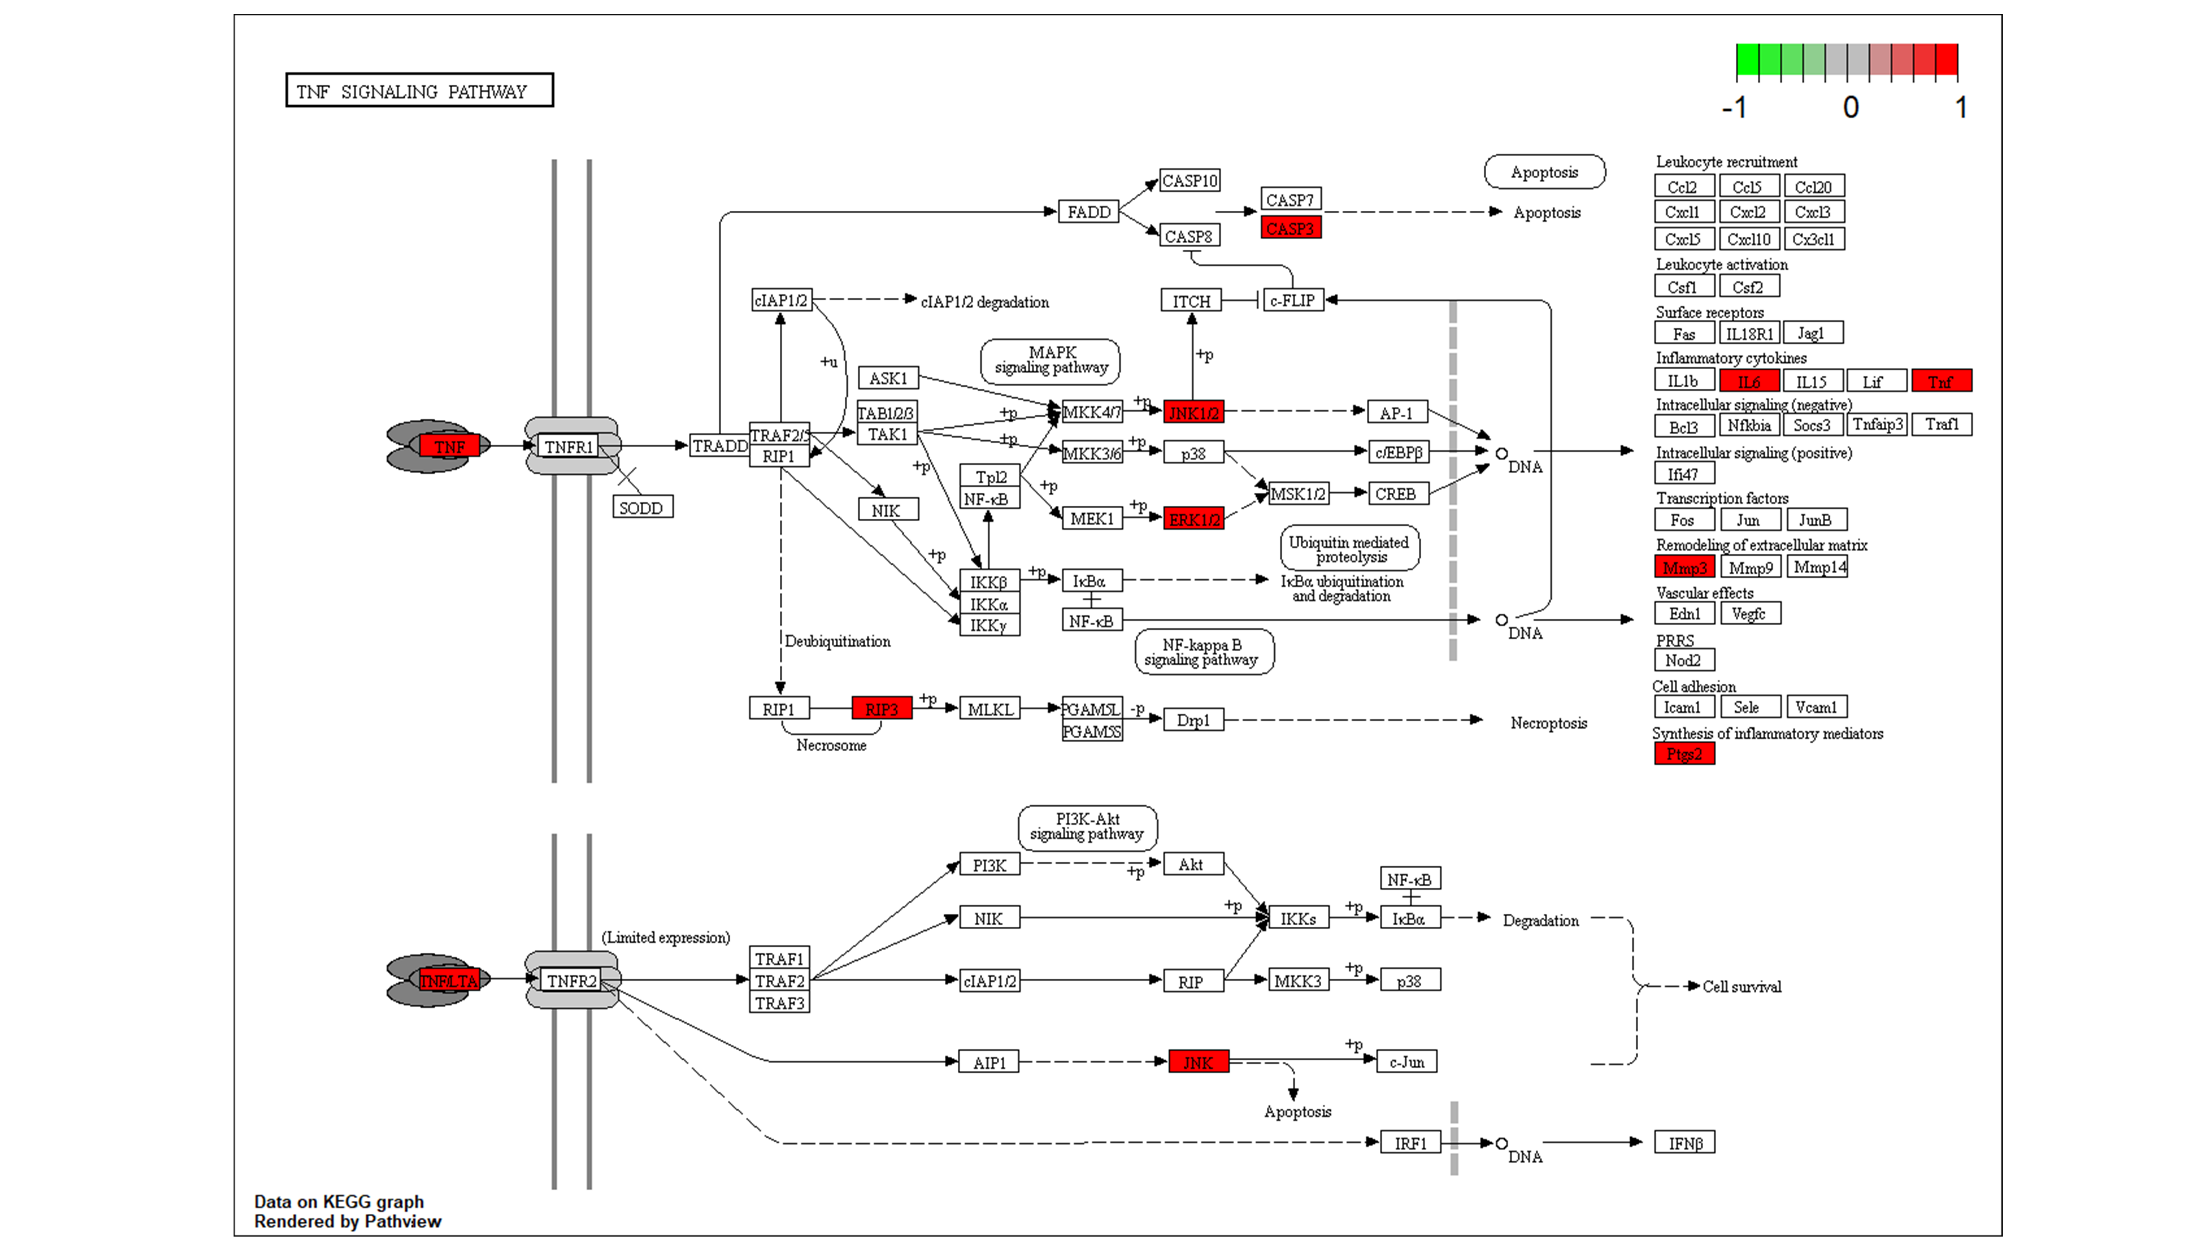


**Supplementary Figure 2** The TNF signaling pathway map of potential target genes of WLS in HUA.

**
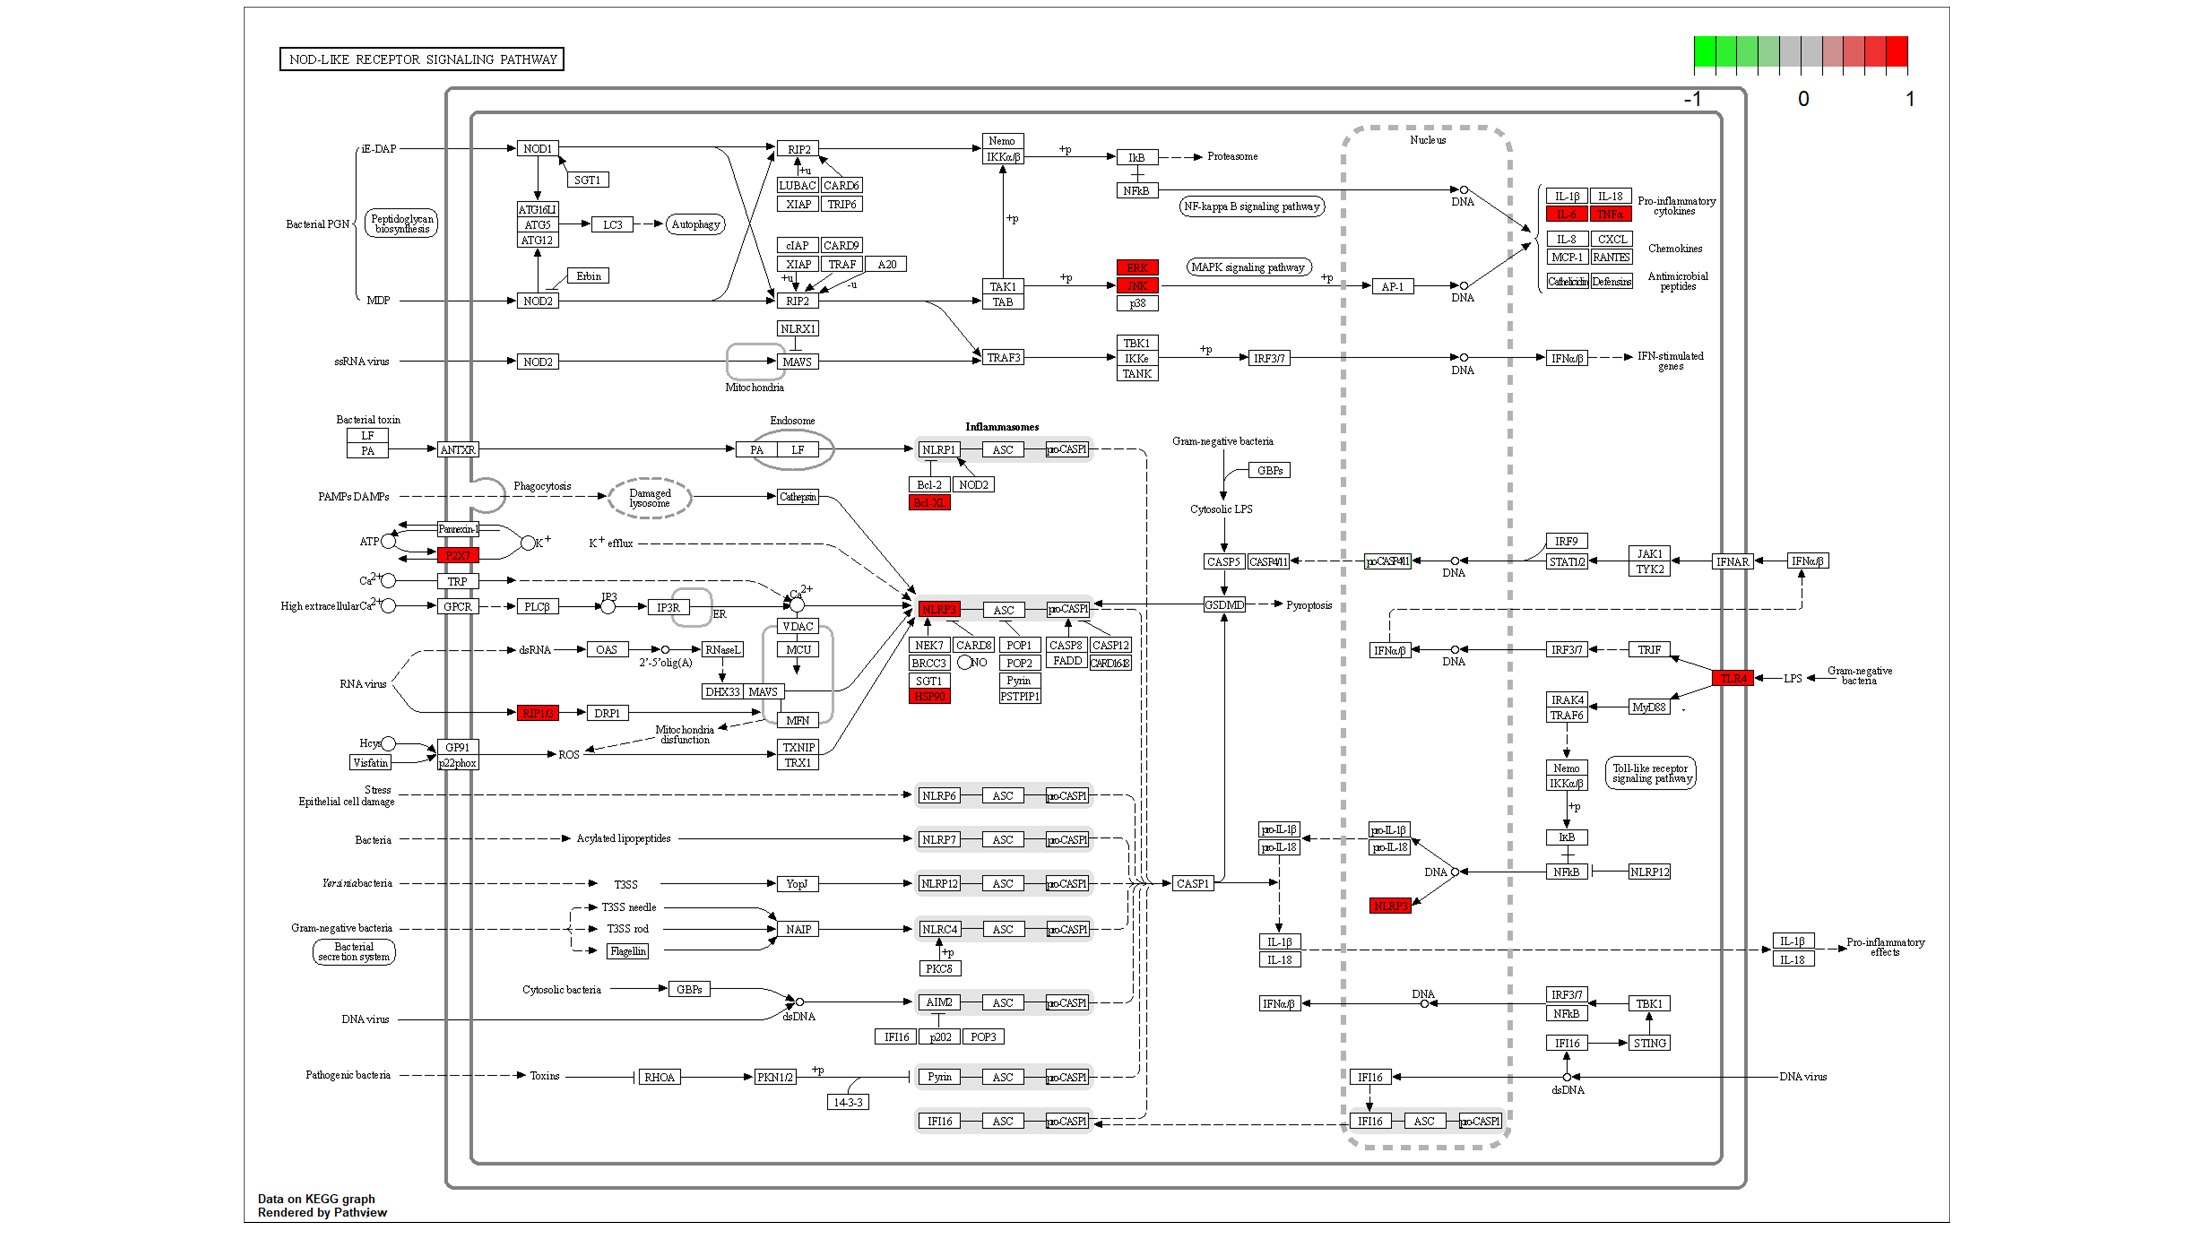
**

**Supplementary Figure 3** The NOD-like receptor signaling pathway map of potential target genes of WLS in HUA.

**
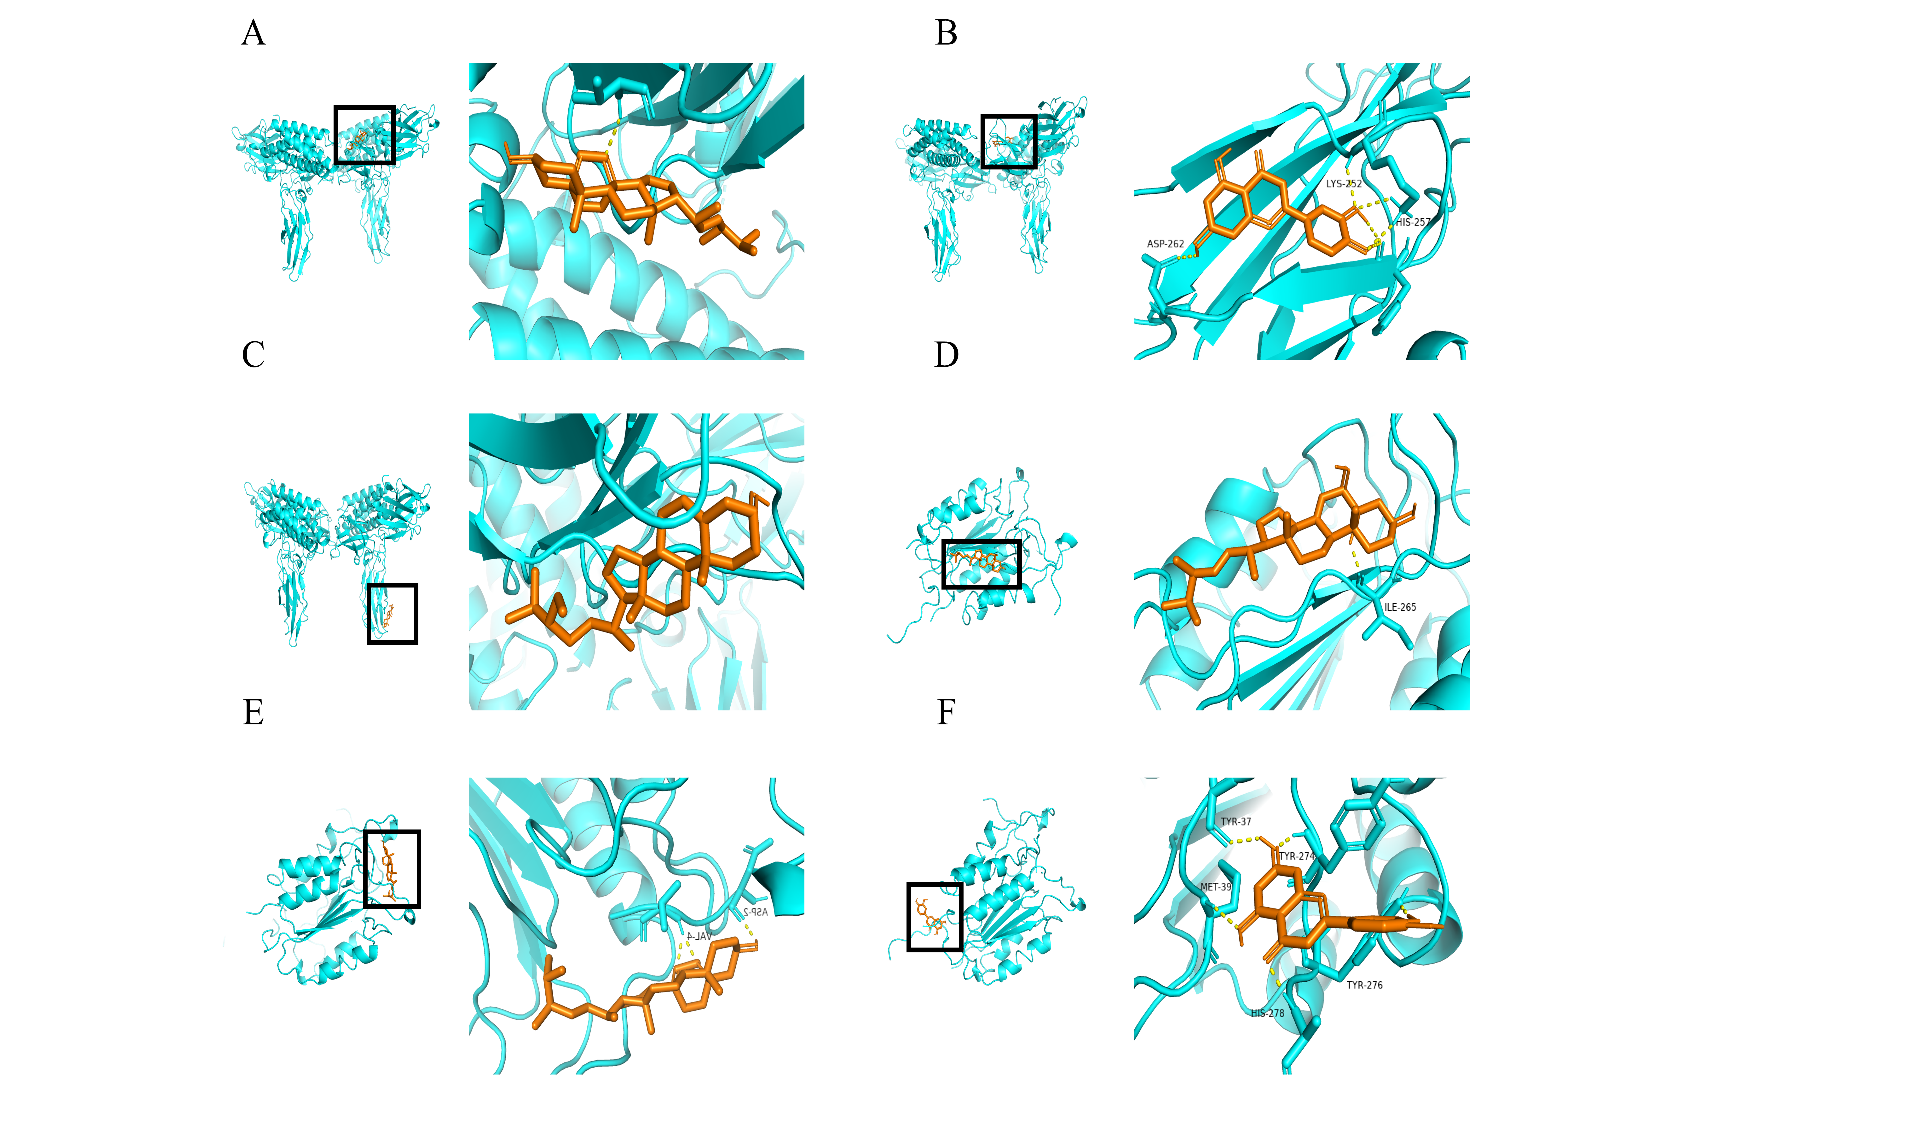
**

**Supplementary Figure 4** Molecular docking of IL6 and CASP3 with Luteolin, Sitosterol, Cerevisterol, and Ergosterol Peroxide. **(A)** IL6 and Ergosterol Peroxide. **(B)** IL6 and Luteolin. **(C)** TNF and Sitosterol. **(D)** CASP3 and Cerevisterol. **(E)** CASP3 and Ergosterol Peroxide. **(F)** CASP3 and Luteolin.


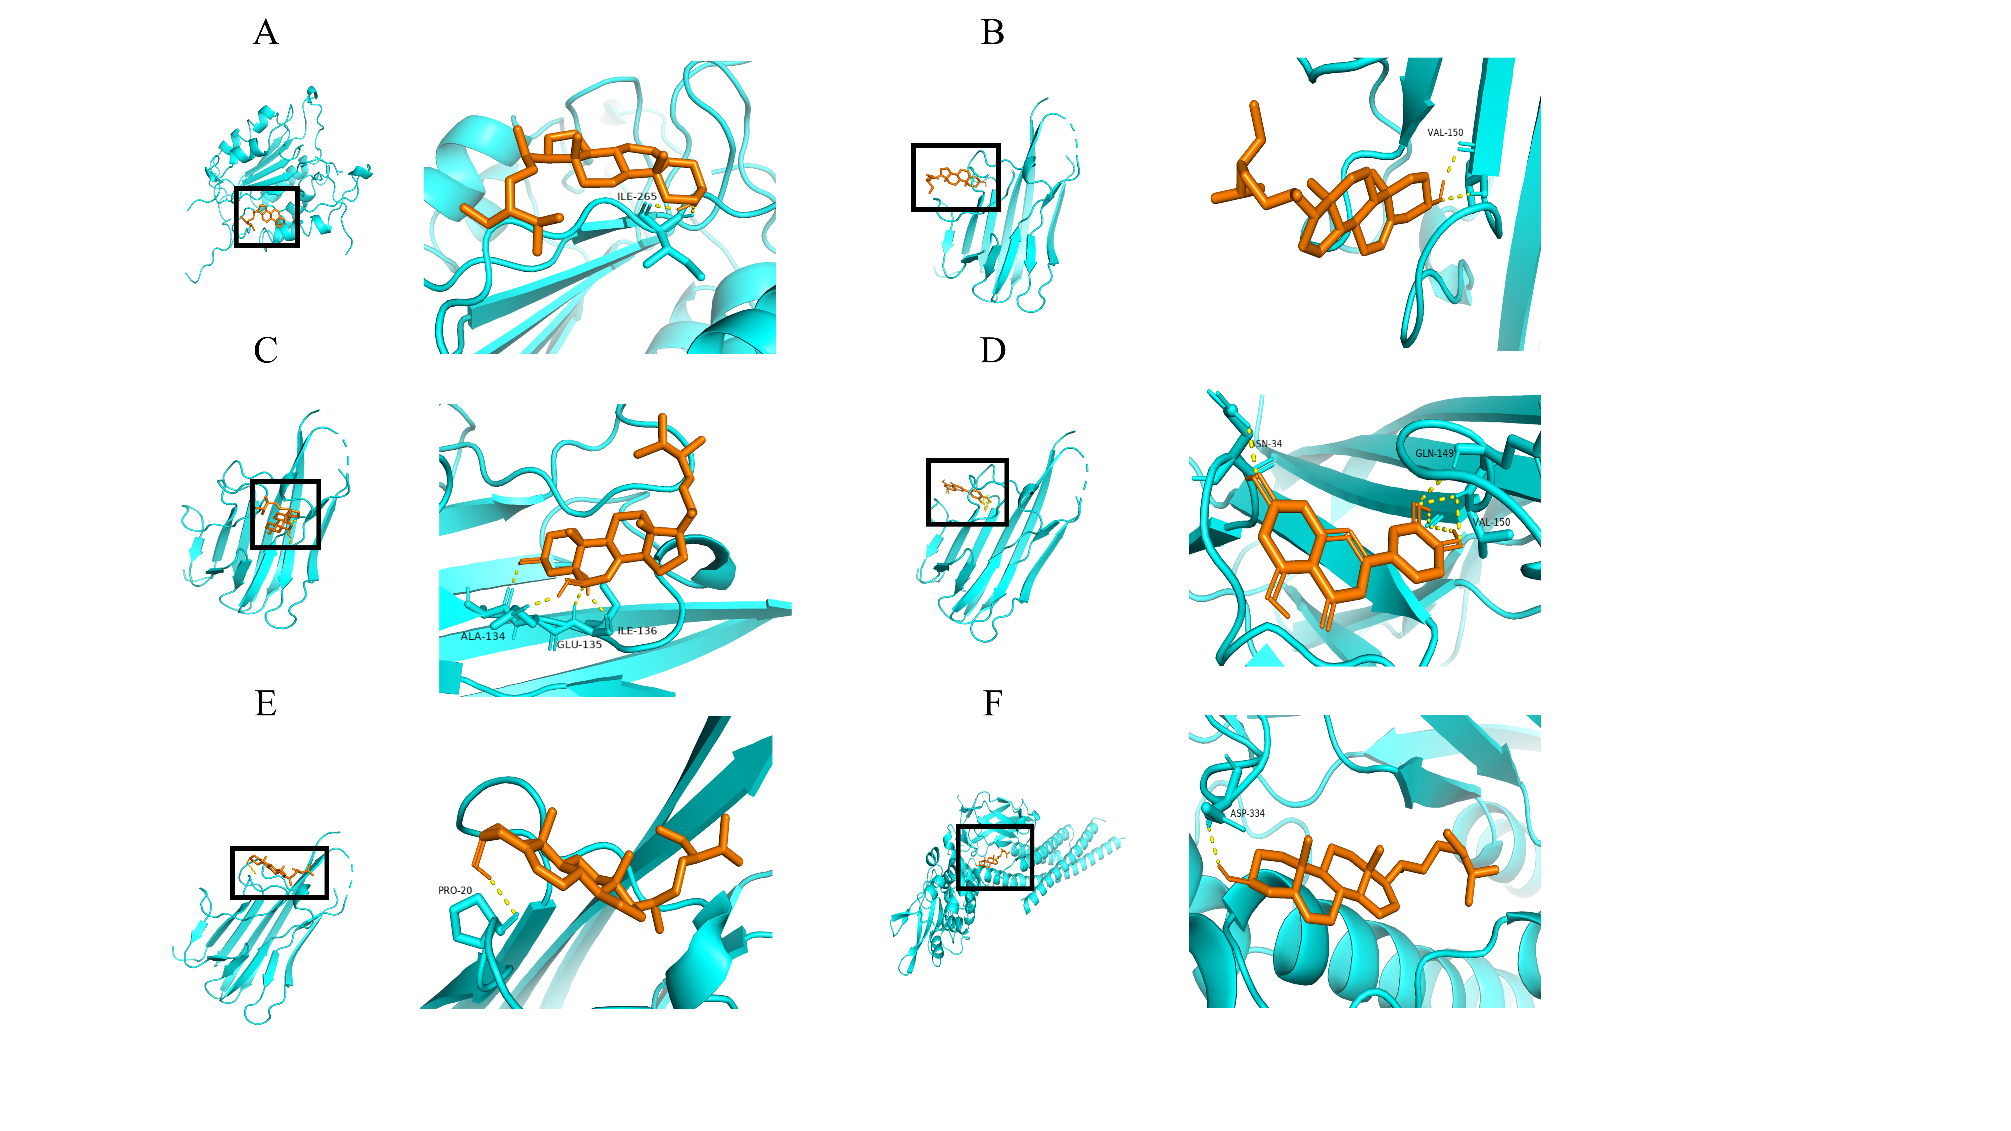


**Supplementary Figure 5** Molecular docking of CASP3, TNF, and STAT3 with Sitosterol, Beta-Sitosterol, Cerevisterol, and Luteolin. **(A)** CASP3 and Sitosterol. **(B)** TNF and Beta-Sitosterol. **(C)** TNF and Cerevisterol. **(D)** TNF and Luteolin. **(E)** TNF and Sitosterol. **(F)** STAT3 and Beta-Sitosterol.


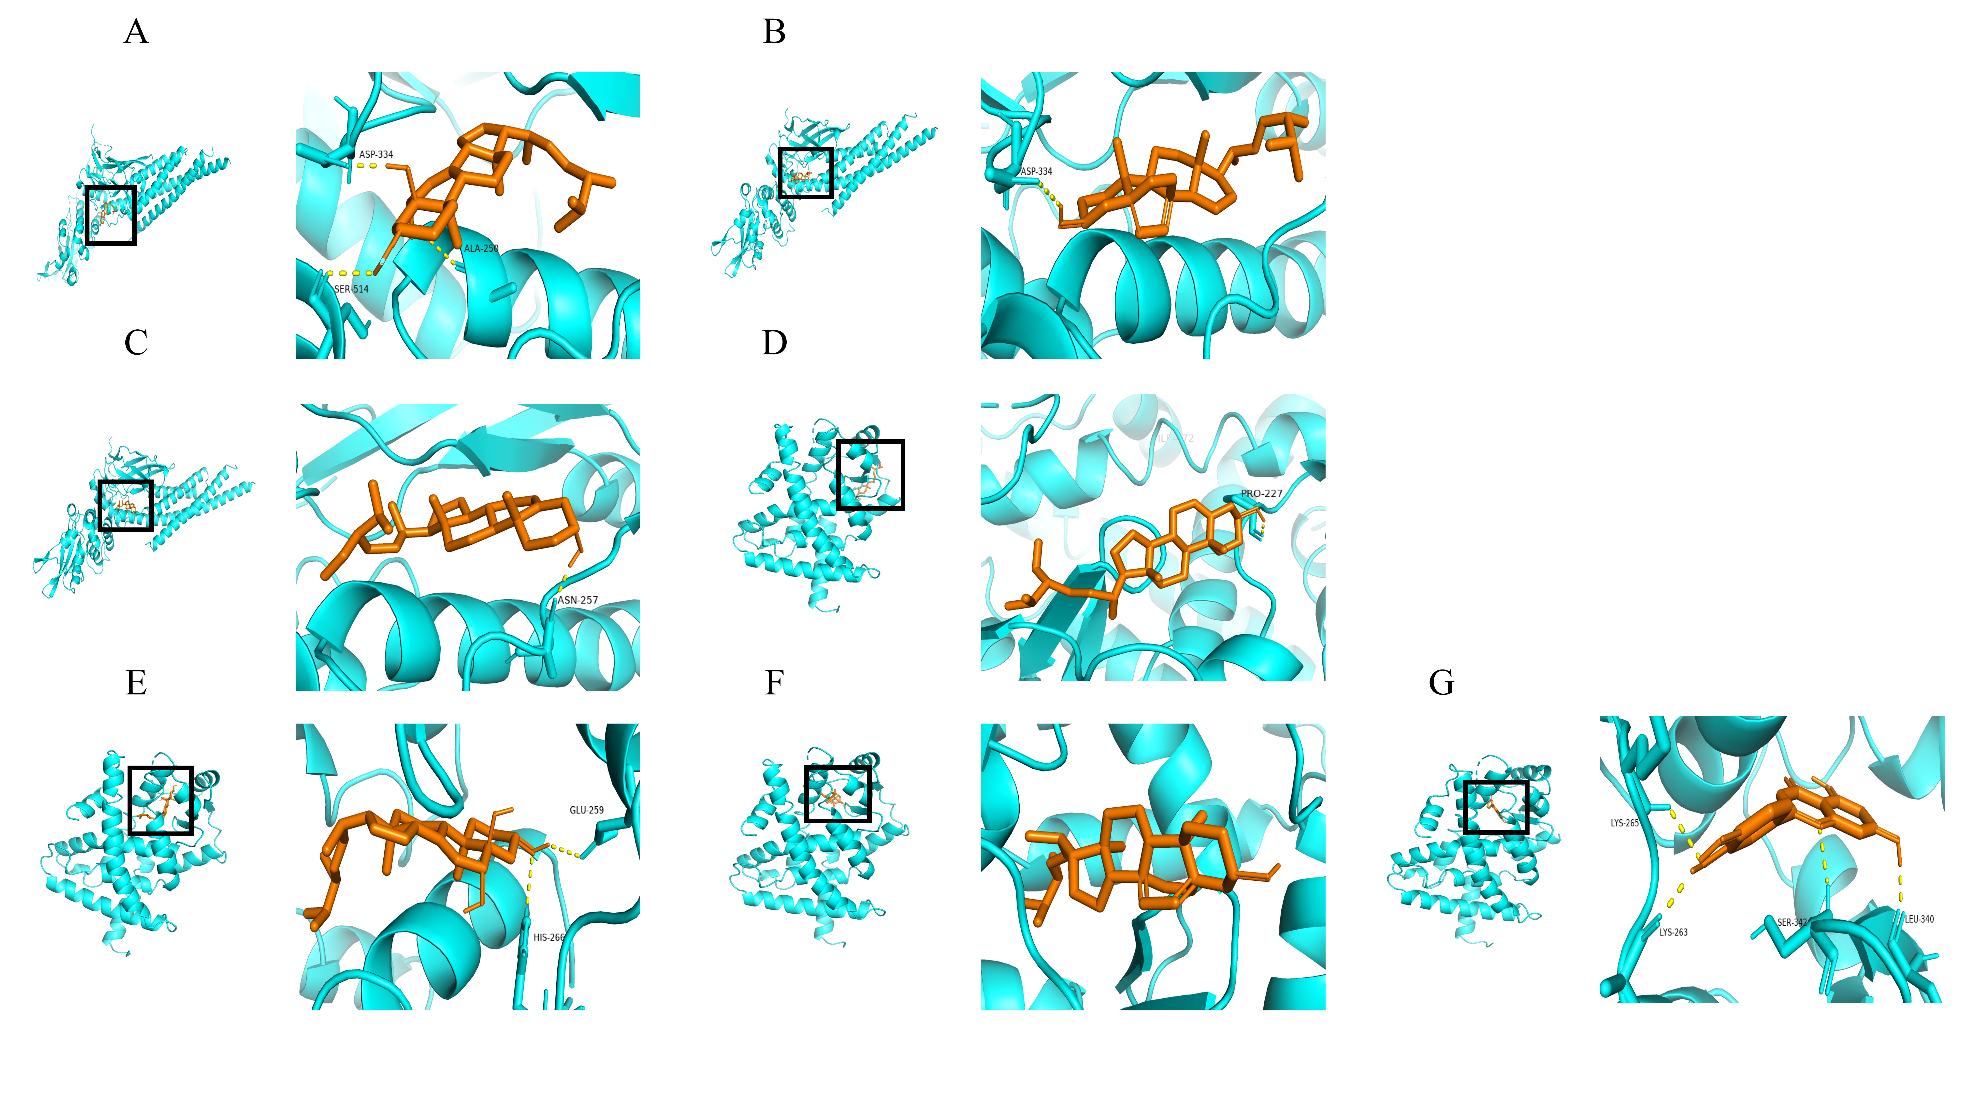


**Supplementary Figure 6** Molecular docking of STAT3 and PPARG with Cerevisterol, Ergosterol Peroxide, Sitosterol, Beta-Sitosterol, and Luteolin. **(A)** STAT3 and Cerevisterol. **(B)** STAT3 and Ergosterol Peroxide **(C)** STAT3 and Sitosterol. **(D)** PPARG and Beta-Sitosterol. **(E)** PPARG and Cerevisterol. **(F)** PPARG and Ergosterol Peroxide. **(G)** PPARG and Luteolin.
